# Supplementary material for: Distinct disease mutations in DNMT3A result in a spectrum of behavioral, epigenetic, and transcriptional deficits
Source: PubMed Central journal article supplement — bioRxiv. 2023 Feb 27:2023.02.27.530041. Preprint. [Version 1] doi: 10.1101/2023.02.27.530041 (PMC10002657; doi:10.1101/2023.02.27.530041), 2023-02-27

799

800 **Supplemental Figure 1: Generation of the P900L mutant model**

801 (A) Sanger sequencing tracks indicating heterozygous P900L point mutation. The WT CCG  
802 codon is changed to a P900L CTG codon, with the mutation highlighted in blue.

803 (B) Example gel from restriction enzyme genotyping from WT and P900L/+ ear lysate. Digested  
804 WT PCR products are at approximately 285bp and 421bp, whereas P900L PCR products  
805 are undigested and remain at the full 706bp.

806 (C) Representative image of WT and P900L mouse at 30 weeks of age.

807 (D) Quantification of DNMT3A expression from 2-week cortex by RT-qPCR (n=5/genotype, 3  
808 males, 2 females) and western blot (n=8/genotype, 4 males, 4 females). Student's T-Test; \*  
809 p<0.05.

810 Box plot indicates 25<sup>th</sup> percentile, median, and 75<sup>th</sup> percentile. Whiskers indicate minimum and  
811 maximum.

812

813 **Supplemental Figure 2: P900L mutants do not show activity or anxiety-like phenotypes,  
814 but do have changes in social and tactile behaviors**

815 (A-B) Time on a continuous (A) or accelerating (B) rotarod indicates no significant differences  
816 between WT and P900L animals.

817 (C) Walking initiation assay, with time to leave a marked square measured.

818 (D-F) Genotypes had no significant differences in latency to fall of a (D) ledge, (E) platform, or  
819 (F) an inverted screen.

820 (G-H) Genotypes had no significant differences in time taken to (G) turn and climb down a pole,  
821 or (H) time to the top of a 60° or 90° screen.

822 (I) Time freezing during conditioned fear training, during baseline (before tone and shock) and  
823 during tone and shock association training.

824 (J) Distance traveled during the 3-chamber social approach assay.

825 (K) Body weights of animals during tube test assay indicate no significant differences between  
826 genotypes for the P900L animals vs. WT littermates. Body weight and size can have a  
827 significant impact on social hierarchies, and testing was done before mutants increased in  
828 size.

829 (L-N) Measures of volume (L), average frequency (M), and duration (N) of ultrasonic  
830 vocalization calls in the WT and P900L animals.

831 (O-P) Time spent investigating objects in NORT (O) and NOR (P) trials for WT and P900L  
832 animals.

833 (Q) Body weight of R878H animals vs. WT littermates during tube test trials.

834 (R) Active vs. Passive animal status during R878H or WT wins (see methods).

835 (S-U) Measures of volume (S), average frequency (T), and duration (U) of ultrasonic  
836 vocalization calls in the WT and R878H animals.

837 (V-W) Time spent investigating objects in NORT (V) and NOR (W) trials for WT and R878H  
838 animals.

839 Bar graphs and line plots indicate mean  $\pm$  SEM; Box-and-whisker plots indicate mean and  
840 quartiles. Detailed statistics, and sample sizes in Supplemental Table 1.

841

842 **Supplemental Figure 3: P900L and R878H mutants exhibit transcriptional overlap with**  
843 **other models disrupting the neuronal epigenome, and mutants also exhibit specific**  
844 **downregulated effects**

- 845 (A) Log<sub>2</sub> fold changes in the P900L- and R878H- mutants at genes significantly disrupted  
846 upon homozygous KO of DNMT3A in postmitotic neurons (Clemens *et al.*, 2019)  
847 (B) P900L- and R878H-specific downregulated gene sets indicated in purple and teal.  
848 Specific genes are defined as those that are significantly downregulated in one mutant,  
849 and either significantly unchanged (nominal p-value > 0.5) or upregulated in the other  
850 (fold change > 0).  
851 (C) Most significant PANTHER gene ontology (biological process) terms enriched in P900L-  
852 specific and R878H-specific downregulated gene lists. No terms were significantly  
853 enriched in the P900L-specific downregulated gene sets.  
854 (D) Log<sub>2</sub> fold changes in the P900L- and R878H- mutants at genes significantly disrupted in  
855 MeCP2 mutants (Clemens *et al.*, 2019)  
856 (E) Log<sub>2</sub> fold changes in the P900L- and R878H- mutants at genes significantly disrupted in  
857 upon homozygous KO of NSD1 in neural progenitors (Hamagami *et al.*, 2023)  
858 Notched box and whisker plots indicate median, interquartile, and confidence interval of median  
859 with significance from Wilcoxon Rank Sum test shown. Detailed statistics, and sample sizes in  
860 Supplemental Table 1. \*\*  $p < 0.01$ ; \*\*\*  $p < 0.001$ ; #  $p < 0.0001$ ; ##  $p < 2 \times 10^{-10}$   
861

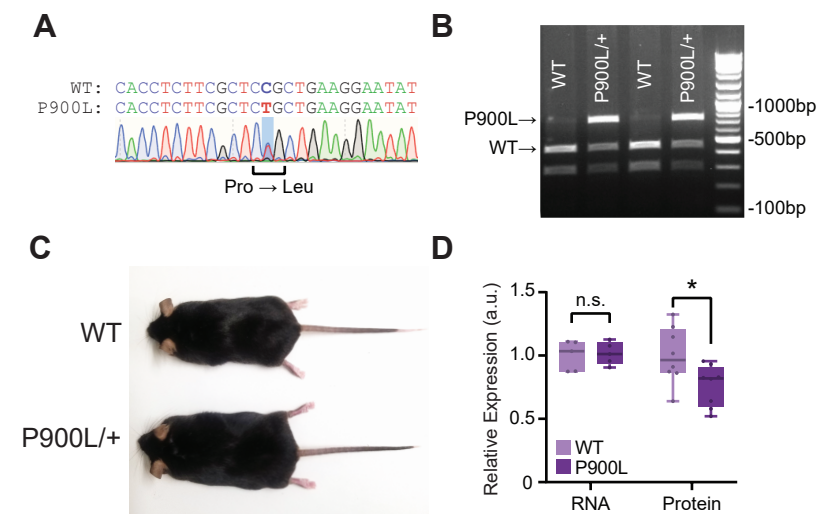

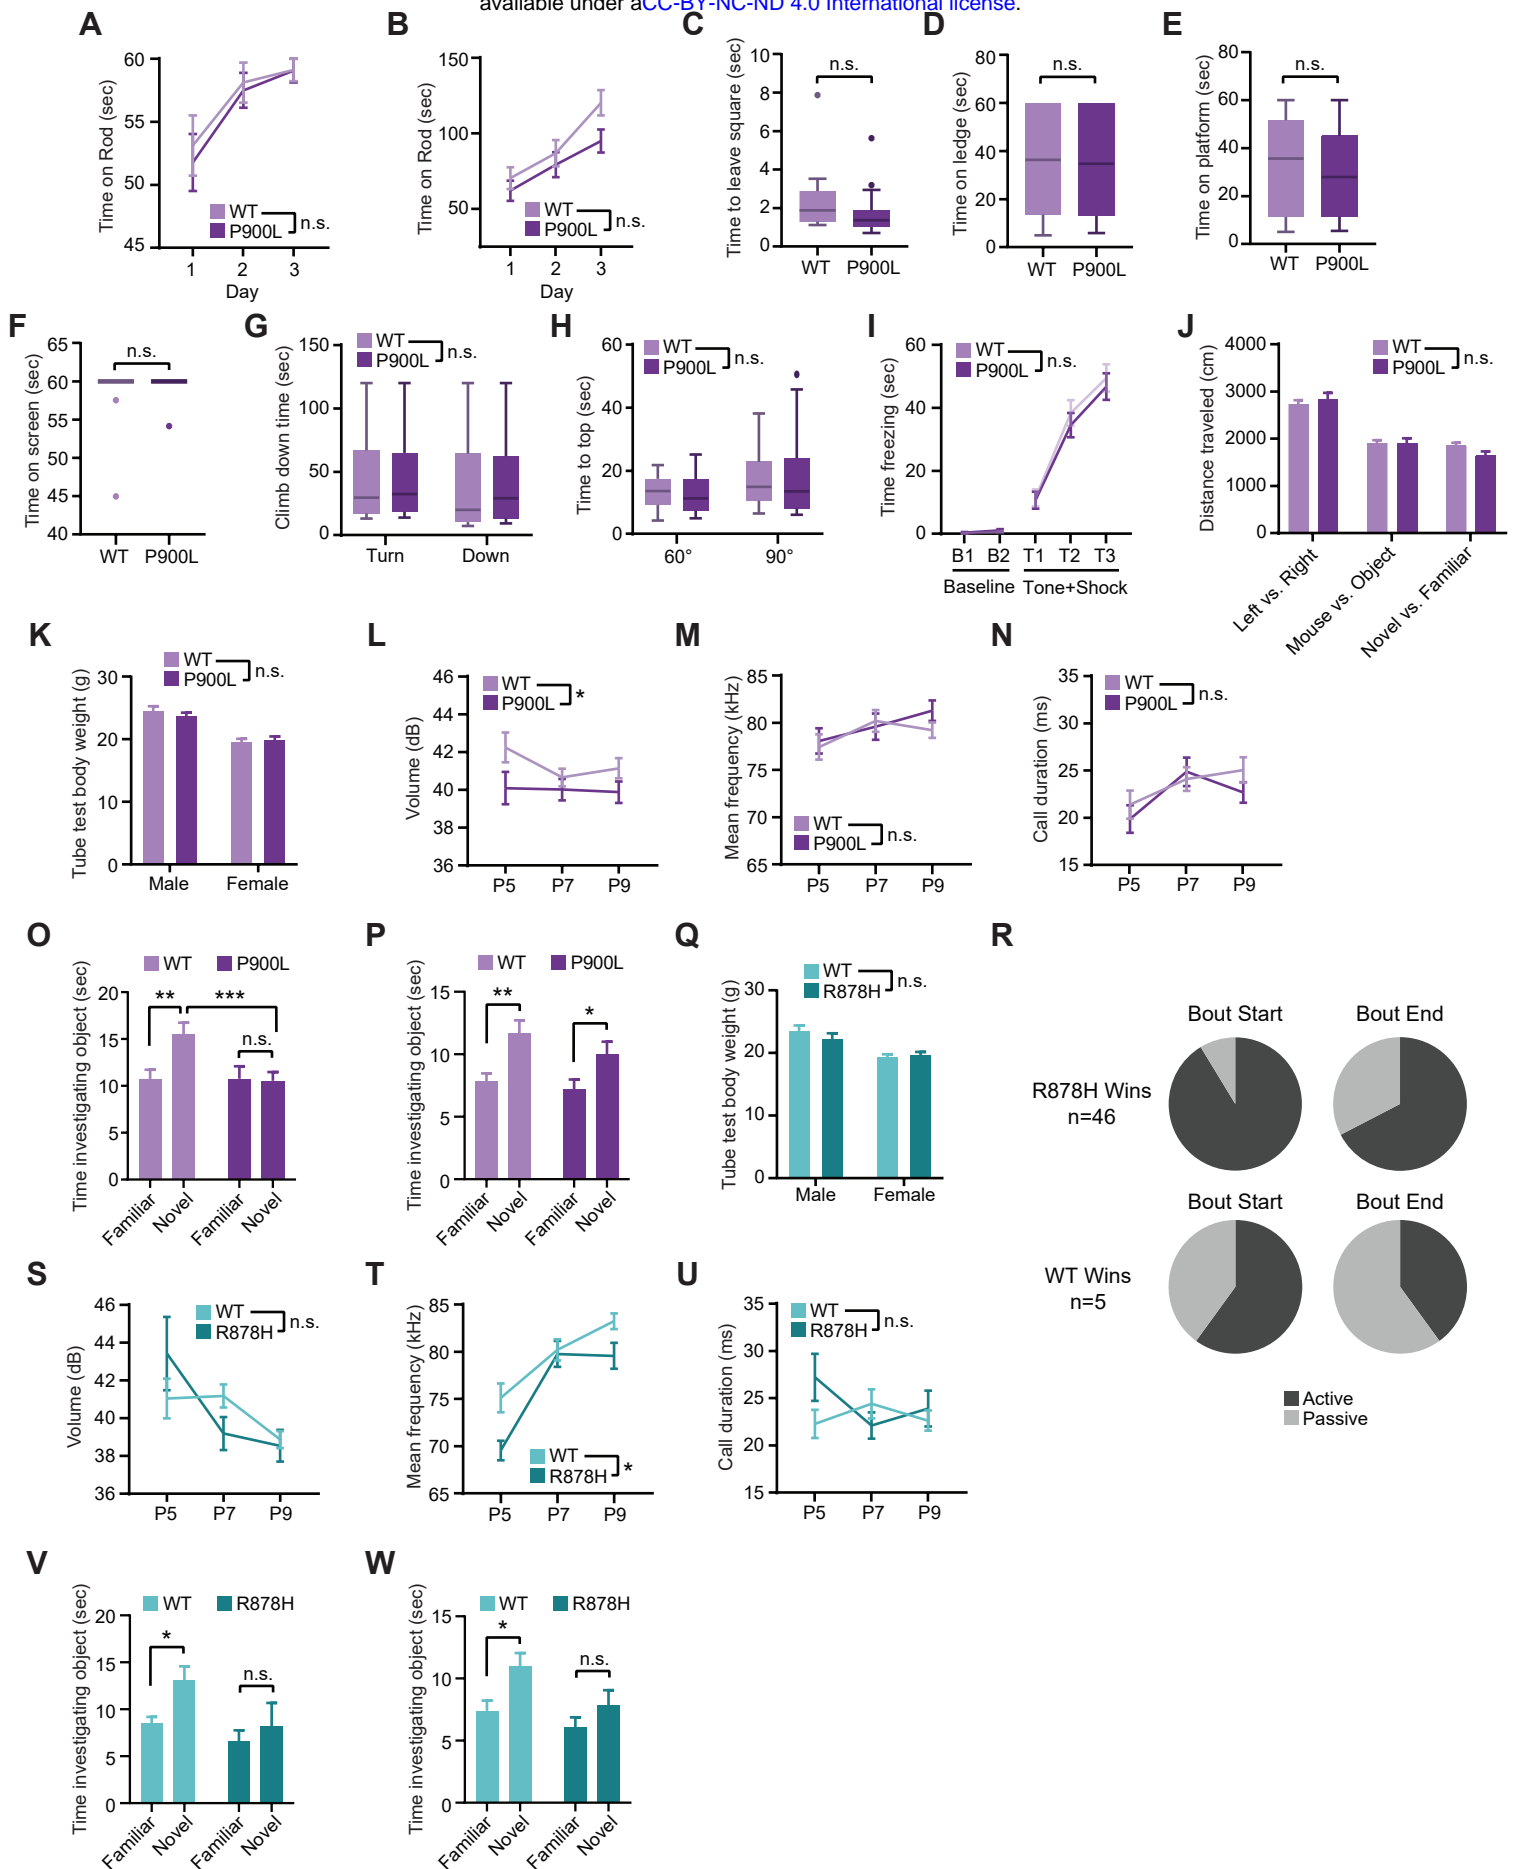

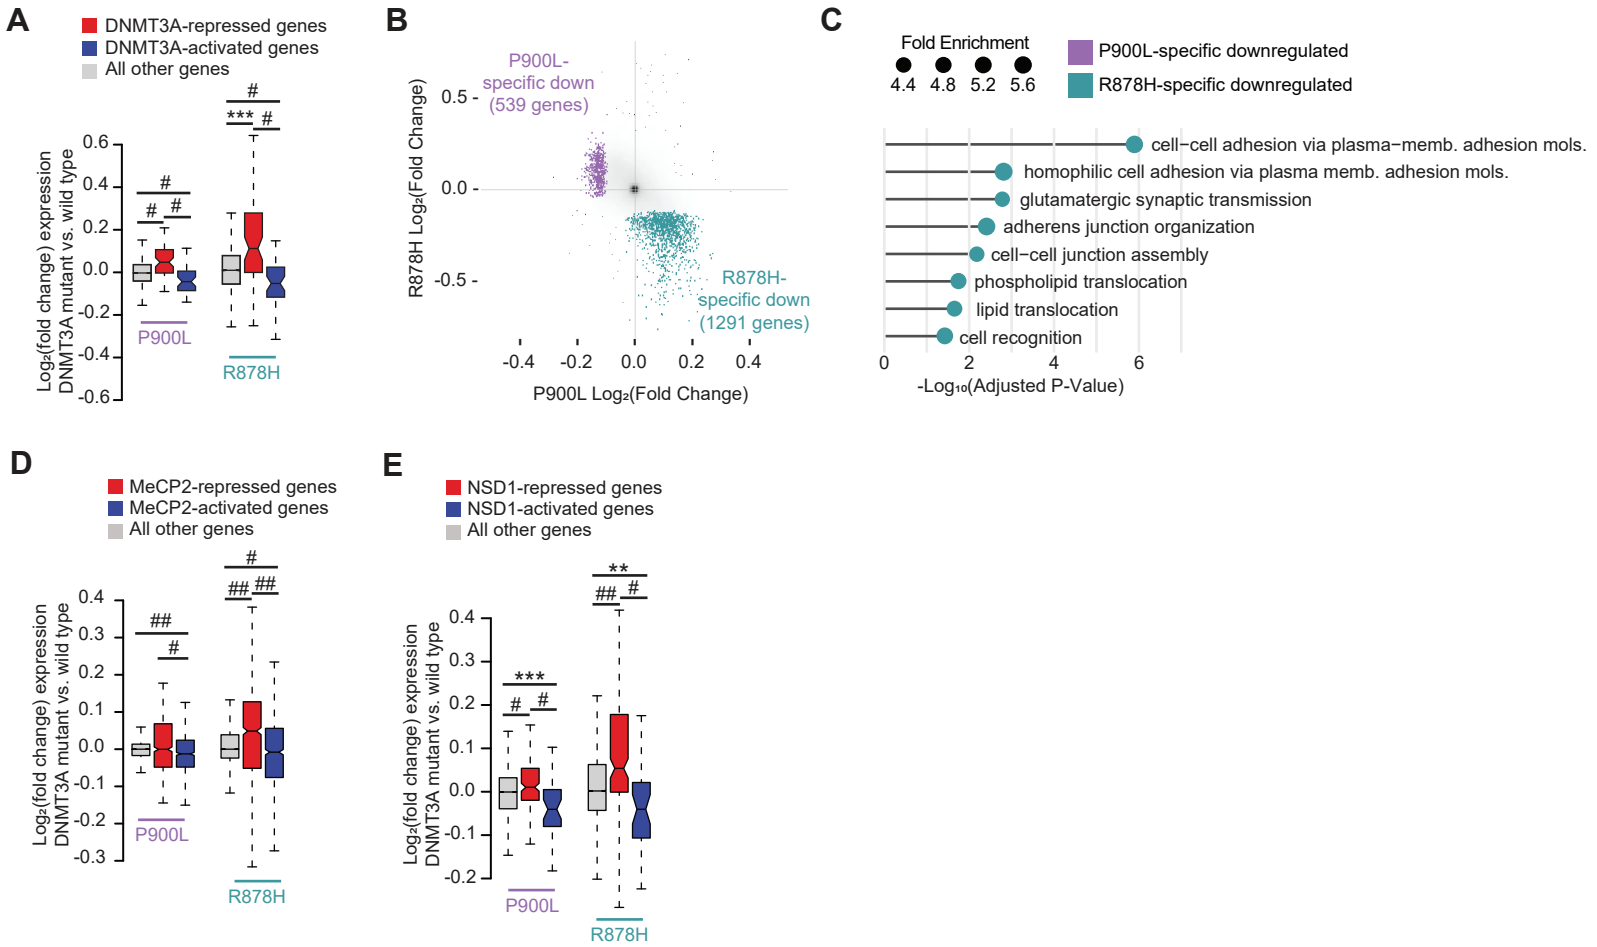

Supplement: NIHPP2023.02.27.530041v1-supplement-3.pdf [file NIHPP2023.02.27.530041v1-supplement-3.pdf]
